# Supplementary material for: The Benefits of Attending the Annual Biomedical Research Conference for Minority Students (ABRCMS): The Role of Research Confidence
Source: Atypon-hosted journal article supplement (doi:10.1187/cbe.16-01-0048), 2016-08-25
Supplement: combinedsupmats.pdf [file combinedsupmats.pdf]

# Supplemental Material

*CBE—Life Sciences Education*

Casad *et al.*

**1. Which of the following ABRCMS meetings did you attend as an UNDERGRADUATE student? (please check all that apply)**

- 2012 (San Jose, CA)
- 2011 (St Louis, MO)
- 2010 (Charlotte, NC)
- 2009 (Phoenix, AZ)
- 2008 (Orlando, FL)
- 2007 (Austin, TX)

Other, please specify:

**2. How many times did you present a poster or an oral presentation at ABRCMS as an undergraduate student?**

- I never presented as an undergraduate student.
- Once
- Twice
- Three times
- Four or more times

Other (please specify):

**3. If you presented a poster or an oral presentation at ABRCMS as an undergraduate student, how many awards did you receive?**

- I never presented as an undergraduate student.
- None
- One
- Two

Other (please specify):

**4. How many research experiences did you have as an undergraduate student? (One semester or one summer program counts as 1.)**

**5. How many times did you attend ABRCMS as a GRADUATE student?**

- I never attended as a Graduate student
- Once
- Twice
- Three times
- Four times
- Other, please specify:



**7. For each statement, please indicate how your level of confidence changed, if at all, because of attending ABRCMS. My confidence level...**

|                                                                                    | Decreased a lot       | Decreased a little    | Stayed the same       | Increased a little    | Increased a lot       | N/A                   |
|------------------------------------------------------------------------------------|-----------------------|-----------------------|-----------------------|-----------------------|-----------------------|-----------------------|
| Make important contributions to a research team.                                   | <input type="radio"/> |
| Explain my research topic to other scientists.                                     | <input type="radio"/> |
| Pursue a research science career.                                                  | <input type="radio"/> |
| Conduct research.                                                                  | <input type="radio"/> |
| Write a basic research proposal.                                                   | <input type="radio"/> |
| Present a research talk or poster.                                                 | <input type="radio"/> |
| Complete a science degree.                                                         | <input type="radio"/> |
| Persist with science courses even though I may be considered a "minority" in them. | <input type="radio"/> |
| Pursue a graduate degree in science.                                               | <input type="radio"/> |
| Complete a graduate degree in science.                                             | <input type="radio"/> |

**8. Please indicate the number of faculty, staff or students you continue(d) to communicate with after attending ABRCMS:**

Other (please specify):

**9. Did any of the individuals you met at ABRCMS serve as a mentor to you in your educational/professional career?**

- No (please skip to Q11)
- Yes (please answer Q10)

**10. If yes, please describe this mentoring relationship, including length of time:**

**11. How did your career goals change, if at all, because of attending ABRCMS? (please check all that apply)**

- My career goals stayed the same.
- I changed majors or moved into a different discipline in the sciences.
- I left science altogether.
- I decided to pursue a Master's degree.
- I decided to pursue a doctoral degree.
- I decided to pursue an MD/PhD.
- I decided to pursue a professional degree in the sciences (Veterinary, Pharmacy, Medical).
- I decided to become a faculty member.
- I decided to pursue a purely research scientist position.
- I decided to stay in science, but not in a research scientist position.
- I decided to pursue a position in science education.
- I decided to pursue teaching primarily, not a research scientist position.
- I decided to work in industry or at a company (outside of academia).
- I decided to work in a governmental agency.
- Other, please describe:

**12. Which of the following occurred after attending ABRCMS? (please check all that apply)**

- I applied new knowledge learned at ABRCMS into my research.
- I presented my research at a departmental or other event at my institution.
- I presented my research at another student conference (e.g., SACNAS, Leadership Alliance, CIC).
- I presented my research at a national scientific meeting (e.g., AAAS, ACS, APA, ASEE, ASCB, ASM, FASEB, APS, SFN).
- I continued to communicate with students I met at ABRCMS.
- I communicated with an exhibitor or presenter from the conference.
- I established a research collaboration with someone I met.
- I received a summer internship or fellowship to conduct research because of someone I met at ABRCMS.
- I was invited to and visited one or more doctoral or medical programs in the biomedical sciences due to information I received at ABRCMS.
- I was accepted into a post-baccalaureate fellowship based upon information I received or someone I met at ABRCMS.
- I was accepted into a doctoral, medical, or combined graduate and medical program due to information I received or someone I met at ABRCMS.
- I obtained a job through someone I met at ABRCMS.

Other (please specify):

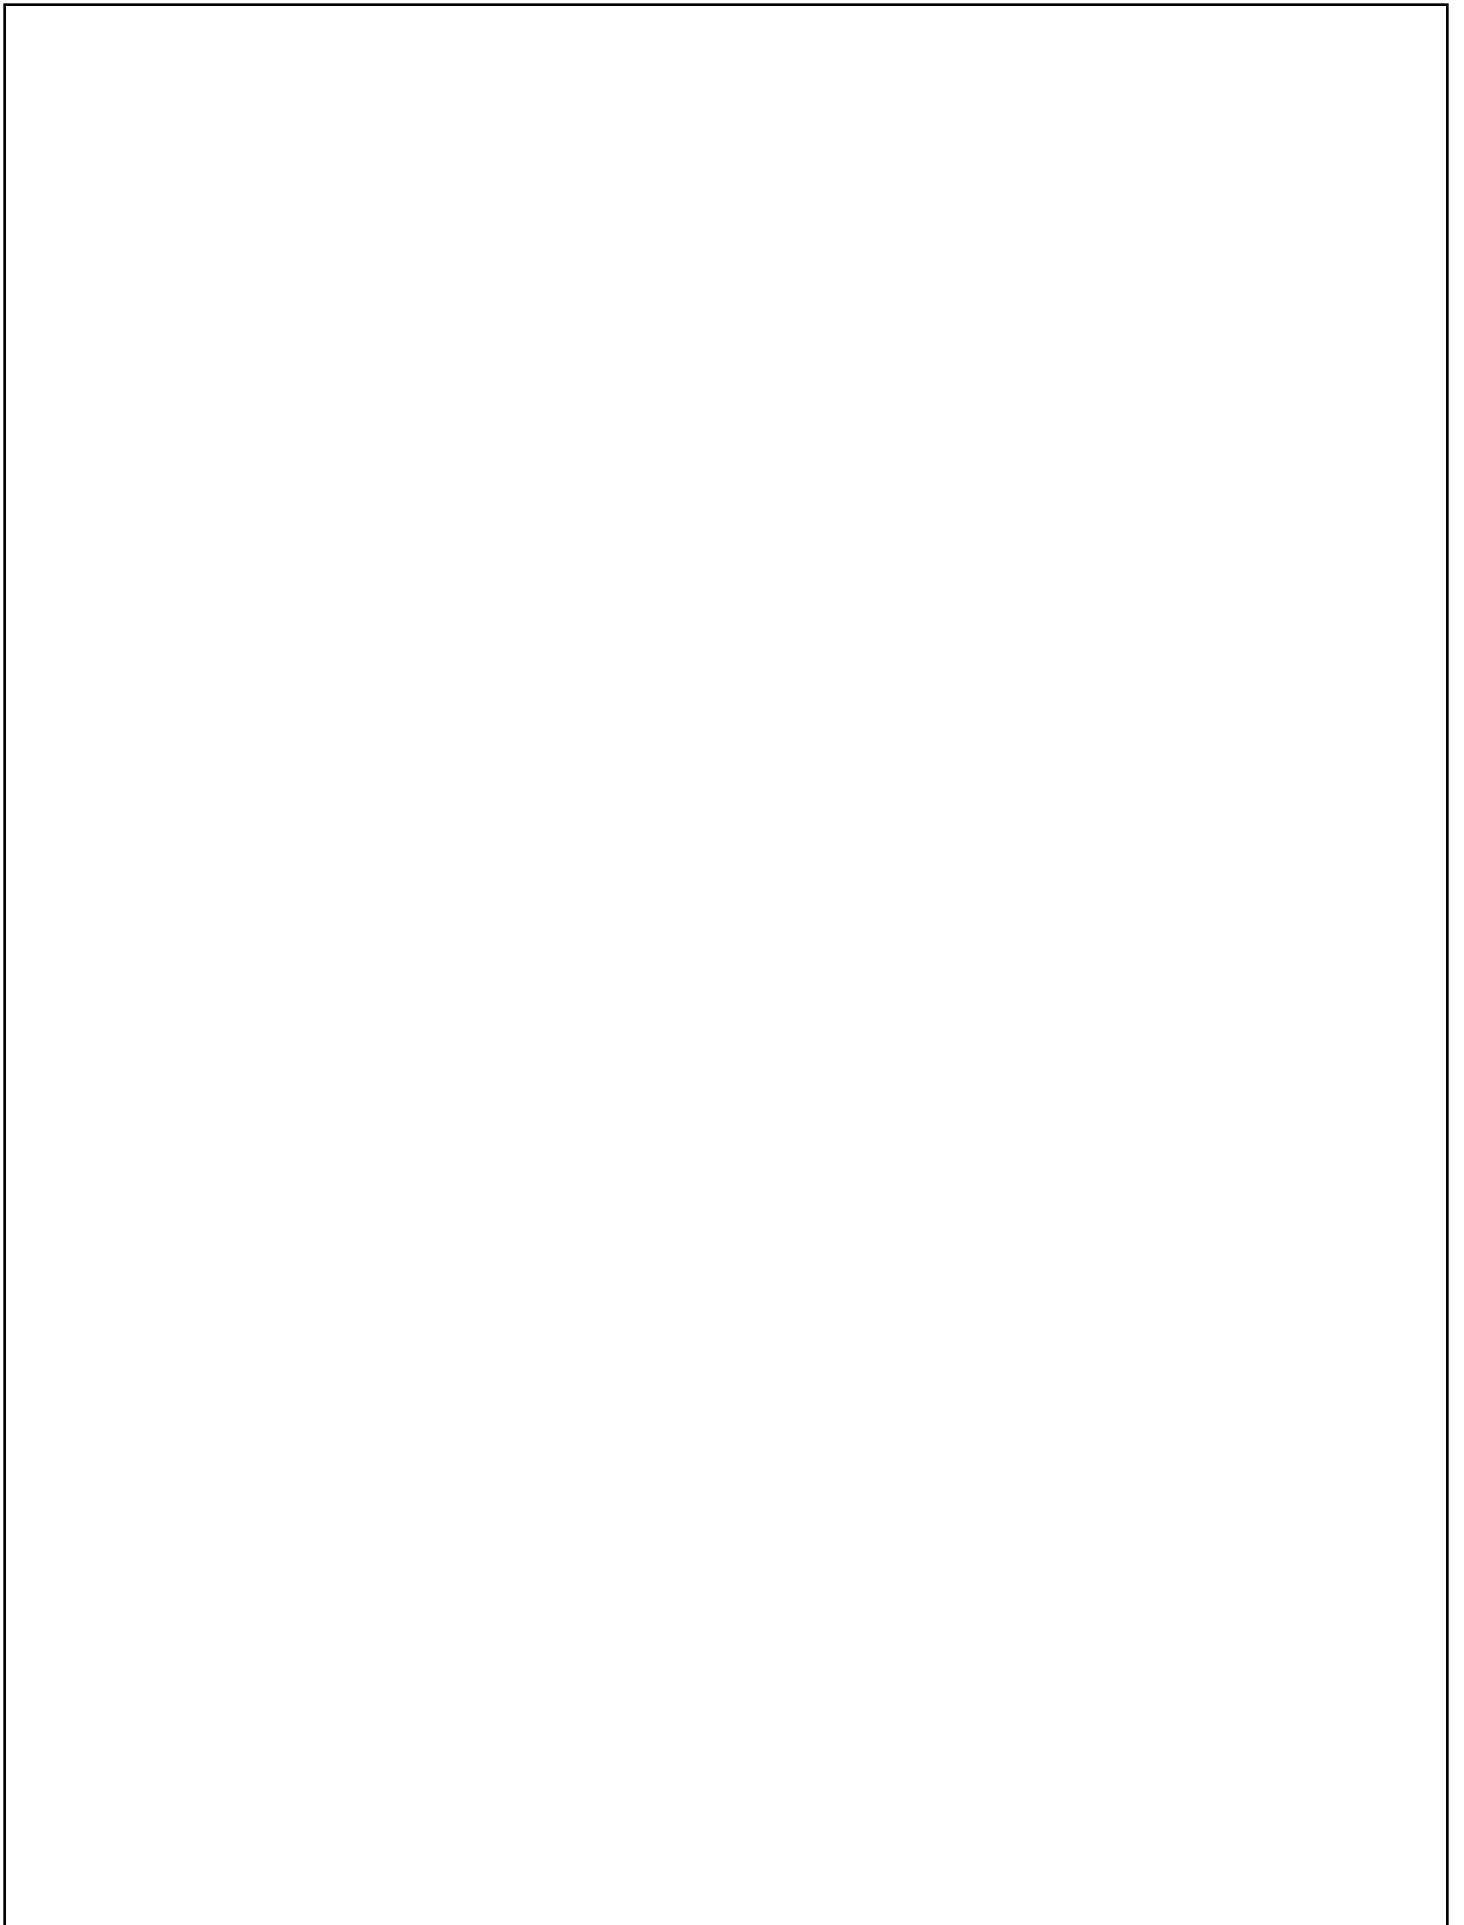

**13. Please indicate your gender:**

- Female
- Male

**14. Please indicate your race/ethnicity:**

- Asian American
- Black/African American
- White/Caucasian
- Hispanic or Latina/o
- Native American
- Pacific Islander or Alaska Native

Other (please specify):

**15. Since attending ABRCMS, which of the following degrees have you earned? (check all that apply)**

- Bachelor's (BS/BA)
- Master's (MS/MA)
- Doctoral (PhD)
- Professional (MD, DVM, PsyD)
- Joint degree (MD/PhD, DVM/PhD)

Other (please specify):

**16. In what year did you earn your most recent degree?**

- 2008
- 2009
- 2010
- 2011
- 2012
- 2013



**17. Please indicate the category that best represents your primary discipline:**

- Biochemistry
- Cancer Biology
- Cell Biology
- Chemistry
- Developmental Biology and Genetics
- Engineering, Physics and Mathematics
- Immunology
- Microbiology
- Molecular and Computational Biology
- Neuroscience
- Physiology
- Social and Behavioral Sciences and Public Health

Other (please specify):

**18. Are you a member of a national professional society in your field or discipline [e.g., American Society for Microbiology (ASM), American Society for Cell Biology (ASCB), National Society of Black Engineers (NSBE)]?**

If YES, which one(s)?

If NO, why not?

**19. How many poster and/or oral presentations have you conducted since attending ABRCMS?**

- 0
- 1
- 2
- 3
- 4
- 5

Other (please specify):

**20. How many research articles have you published since attending ABRCMS?**

- 0
- 1
- 2
- 3
- 4
- 5

Other (please specify):

**21. If you are comfortable sharing information, please use this space to include citations for any posters, oral presentations, or publications.**

**22. Please indicate what you are currently doing:**

- I am a full-time Undergraduate student
- I am a post-baccalaureate fellow
- I am a full-time Master's student
- I am a full-time Doctoral student
- I am a full-time student in a Medical School
- I am a full-time student in a Professional School (e.g., DVM, DDS, PsyD)
- I am in a dual degree programs (e.g., MD/PhD, DVM/PhD).
- I am a full-time professional/employee
- I am seeking a position in science
- I am pursuing another career outside of science

Other (please describe):

**23. Please describe your current educational setting:**

- Four-year college, primarily Bachelor's level, liberal arts
- Bachelor's level, with some Master's programs
- Research University, including Doctoral programs, Medical or other Professional Schools

Other (please specify):

**24. What is the name of your current institution?**

**25. What degree will you earn through your current program?**

- Bachelor's (BS/BA)
- Master's (MS/MA)
- Doctoral (PhD)
- Professional (MD, DVM, PsyD)
- Joint program (MD/PhD)

Other (please specify):

**26. What is your graduation date?**

- 2013
- 2014
- 2015
- 2016
- 2017
- 2018
- 2019
- 2020

**27. What do you plan to do after graduating with this degree?**

- Faculty position (academic setting)
- Scientist position (academic setting)
- Position in industry
- Position in a governmental agency
- I don't know

Other (please specify):

**28. Please describe the setting in which you work:**

Name of company:

Your title:

For how long (number of years)?

**29. Is your current work in the sciences?**

Yes

No

If no, please describe your current work:

**30. Please describe the effects of ABRCMS on your educational and professional choices.**

**31. How would your educational/professional path be different had you NOT attended ABRCMS?**

**32. Do you plan to attend ABRCMS in the future?**

No

Yes

If yes, in what capacity?

**33. Anything else we should know or you would like to share about your ABRCMS experience(s)?**
